# Supplementary material
Source: PubMed Central journal article supplement (PMC5140780)
Supplement: NIHMS783671-supplement-1.pdf [file NIHMS783671-supplement-1.pdf]

## **A TGF $\beta$ -PRMT5-MEP50 Axis Regulates Cancer Cell Invasion through Histone H3 and H4 Arginine Methylation Coupled Transcriptional Activation and Repression**

Hongshan Chen<sup>\*°</sup>, Benjamin Lorton<sup>°</sup>, Varun Gupta<sup>†</sup>, and David Shechter<sup>°\*</sup>

<sup>°</sup>Department of Biochemistry, <sup>†</sup>Cell Biology, Albert Einstein College of Medicine, Bronx, NY 10461

\*For correspondence: [david.shechter@einstein.yu.edu](mailto:david.shechter@einstein.yu.edu); [hongshan.chen@einstein.yu.edu](mailto:hongshan.chen@einstein.yu.edu)

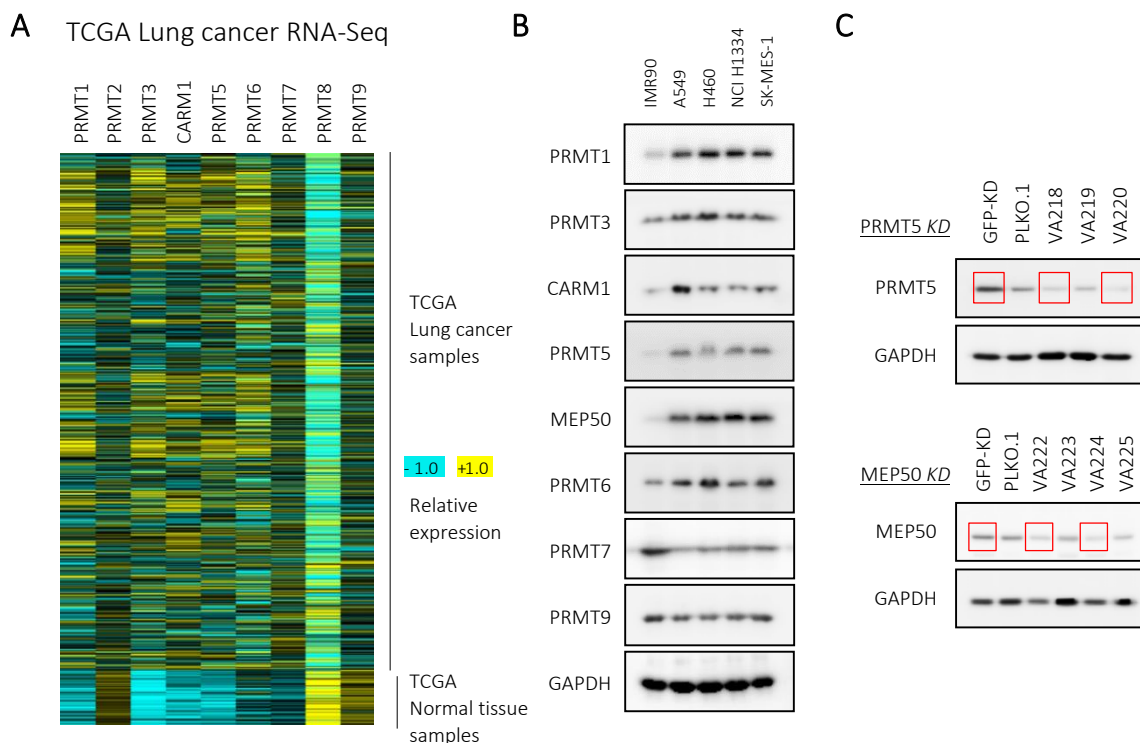

**Supplementary Figure S1, Related to Figure 1.** PRMTs expression profile in lung cancer cell line and PRMT5 and MEP50 shRNA knockdown.

**A.** Heatmap of gene expression of PRMT 1-9 from TCGA lung cancer RNA-Seq data in normal and patients with lung adenocarcinoma (LUAD) or squamous cell carcinoma (LUSC), ranked by sample type (tumor or normal tissue).

**B.** Whole cell lysate immunoblots for PRMTs and MEP50 in the lung fibroblast cell line (IMR90) and corresponding lung cancer cell lines. GAPDH is a loading control.

**C.** Whole cell lysate immunoblots for PRMT5 and MEP50 in A549 cells (Lung adenocarcinoma). GAPDH is a loading control. Different shRNAs against PRMT5 or MEP50 are indicated. shRNAs against GFP or empty vector (PLKO.1) were used as control.

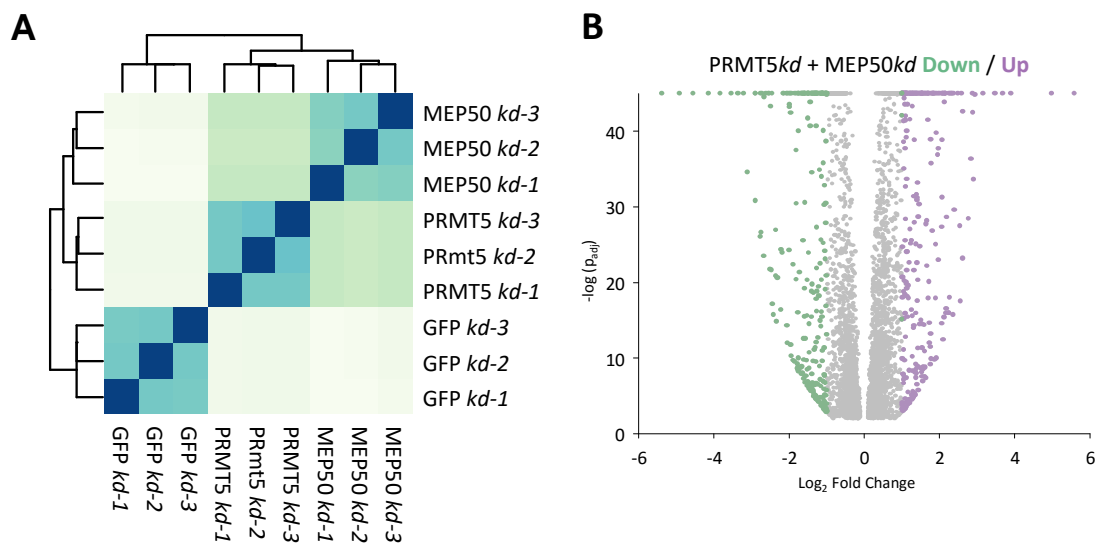

**C Gene Set Enrichment Analysis**

Input dataset = Cufflinks FPKM for PRMT5kd+MEP50kd vs. GFPkd

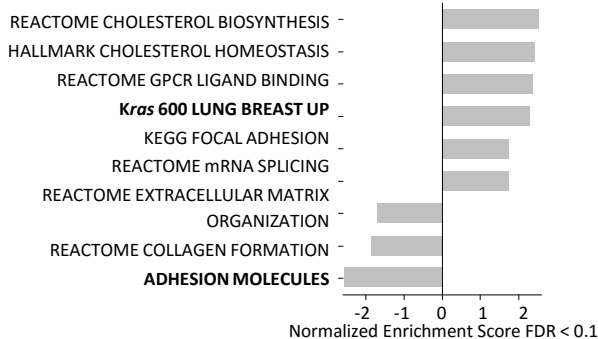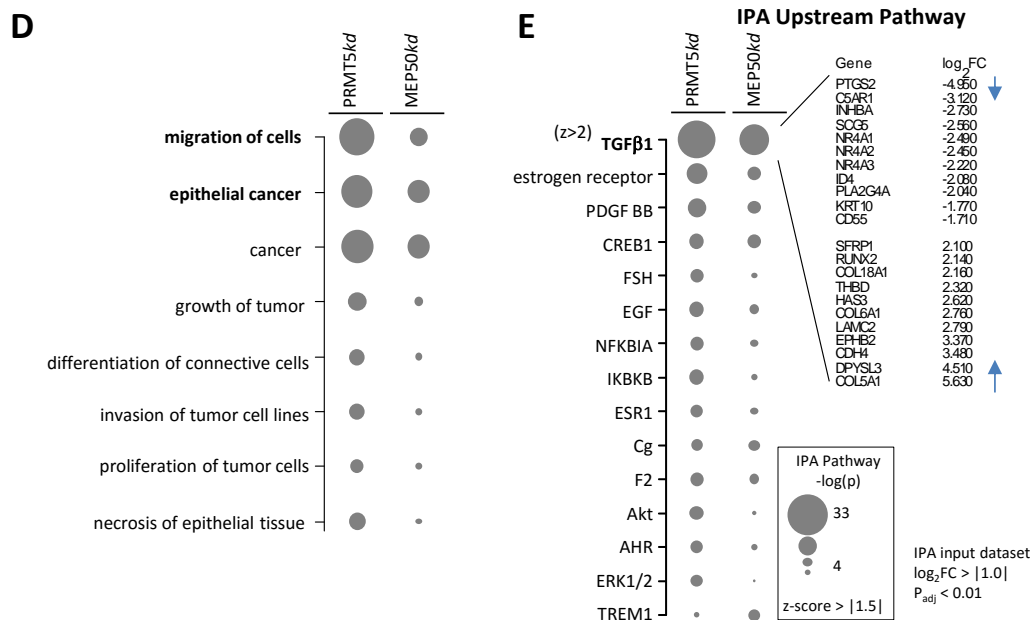

**Figure S2, Related to Figure 2.** Transcriptome is dramatically altered upon PRMT5-MEP50 knockdown.

- A.** The replicates of the PRMT5 and MEP50 knockdown RNA-Seq are highly correlated as illustrated by DESeq2 clustering.
- B.** Volcano plot of Spearman's correlation coefficient for the differentially regulated genes altered in both PRMT5 and MEP50 knockdowns versus the corresponding significance score ( $-\log_2(p_{adj})$ ).
- C.** Functional annotation by gene set enrichment analysis of genes changes upon PRMT5 and MEP50 knockdown in A549 cells. Enriched groups are ranked by the significance  $p$ -value.
- D.** Dotplot of gene ontology terms enriched on PRMT5 and MEP50 knockdown upregulated genes are shown in dots scaled by  $-\log(p)$ .
- E.** Dotplot of Ingenuity Pathway Analysis (IPA) diseases and functions enriched in both knockdowns are shown in dots scaled by  $-\log(p)$ .

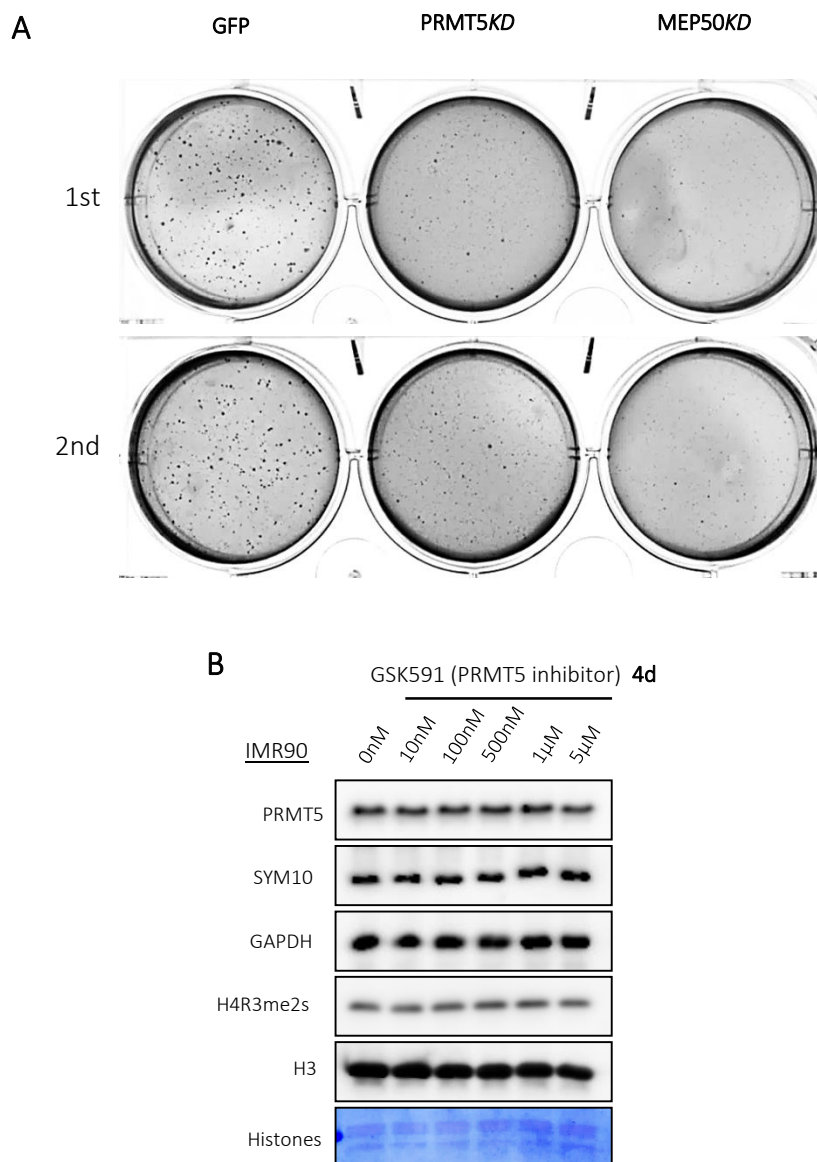

**Figure S3, Related to Figure 3.** PRMT5-MEP50 knockdown can prevent lung cancer cell mobility.

**A.** Representative crystal violet staining for colonies after 14d cell culture of A549 cells expressing shRNA targeted against GFP as a control (*GFPkd*), against PRMT5 (*PRMT5kd*) or against MEP50 (*MEP50kd*). 1st and 2nd represent 2 independently biological experiments.

**B.** Normal lung fibroblast cell line (IMR90) was treated with various indicated dosages of GS591 for 4 days and lysates or extracted histones were blotted for PRMT5, SYM10 (methylated SmD3), GAPDH (control), H4R3me2s, and H3 as indicated. DB71 stain of extracted histones is also shown.

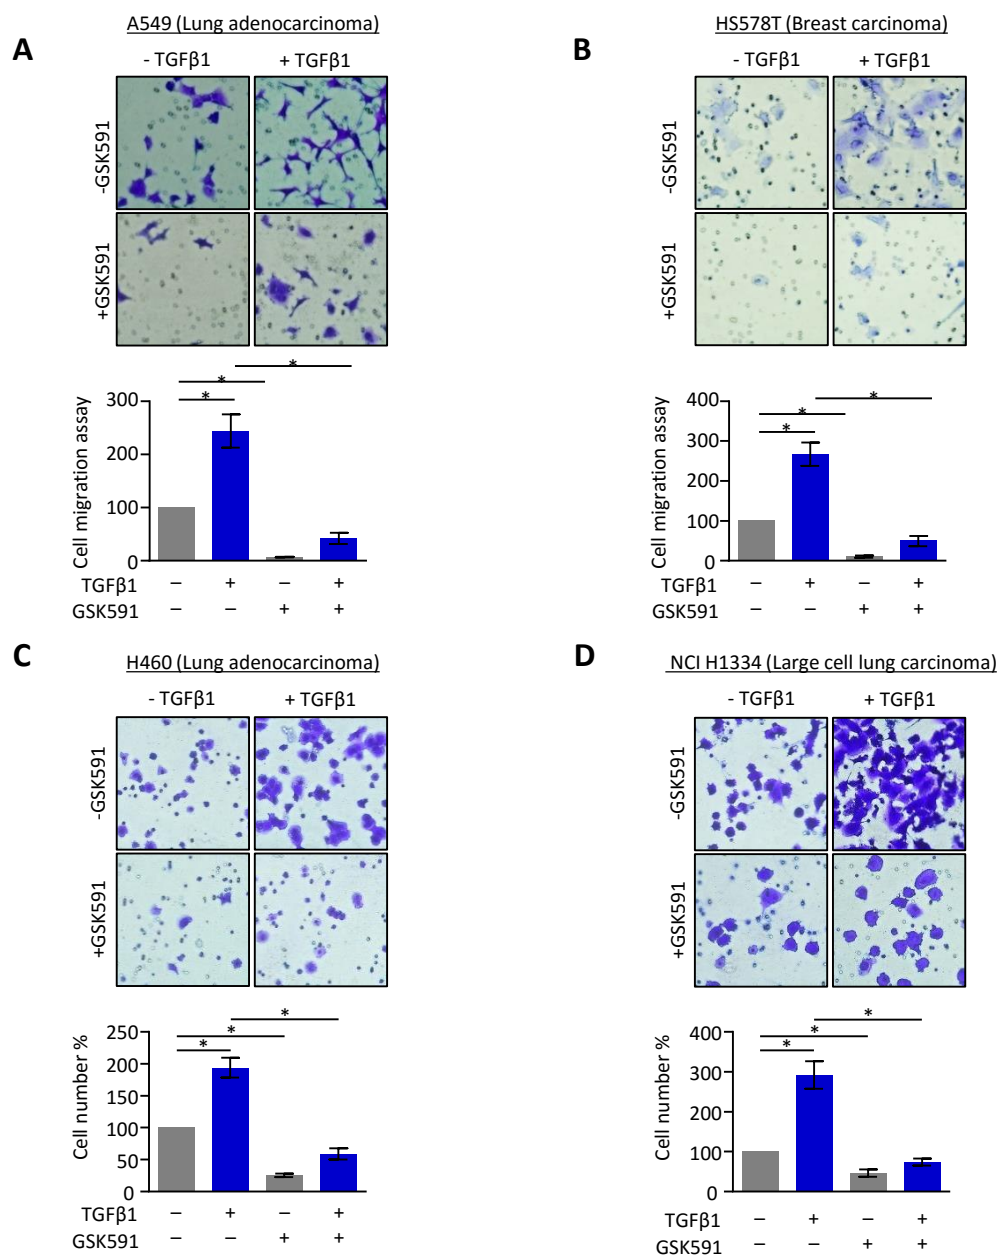

**Figure S4, Related to Figure 4.** PRMT5 inhibitor GSK591 blocked both lung and breast cancer cell lines TGFβ-stimulated cell mobility.

**A.** Cell migration assay for A549 and **(B)** HS578T cell lines. Migration of indicated cells treated with (+) or without (-) 500 nM GSK591 for 4 days and (+) or without (-) 10 nM TGFβ1 for 2 days.

**C.** Cell invasion assay for H460 and **(D)** NCI H1334 cell lines treated with (+) or without (-) 500 nM GSK591 for 4 days and (+) or without (-) 10 nM TGFβ1 for 2 days. Top: Representative crystal violet staining of invaded cells on the underside of the porous polycarbonate membrane through a phase-contrast microscope (20X) is shown. Bottom: Quantification of the invaded cells shown in. Values are mean  $\pm$  S.E.M. of three independent experiments.  $*p < 0.05$  from one-way ANOVA test.

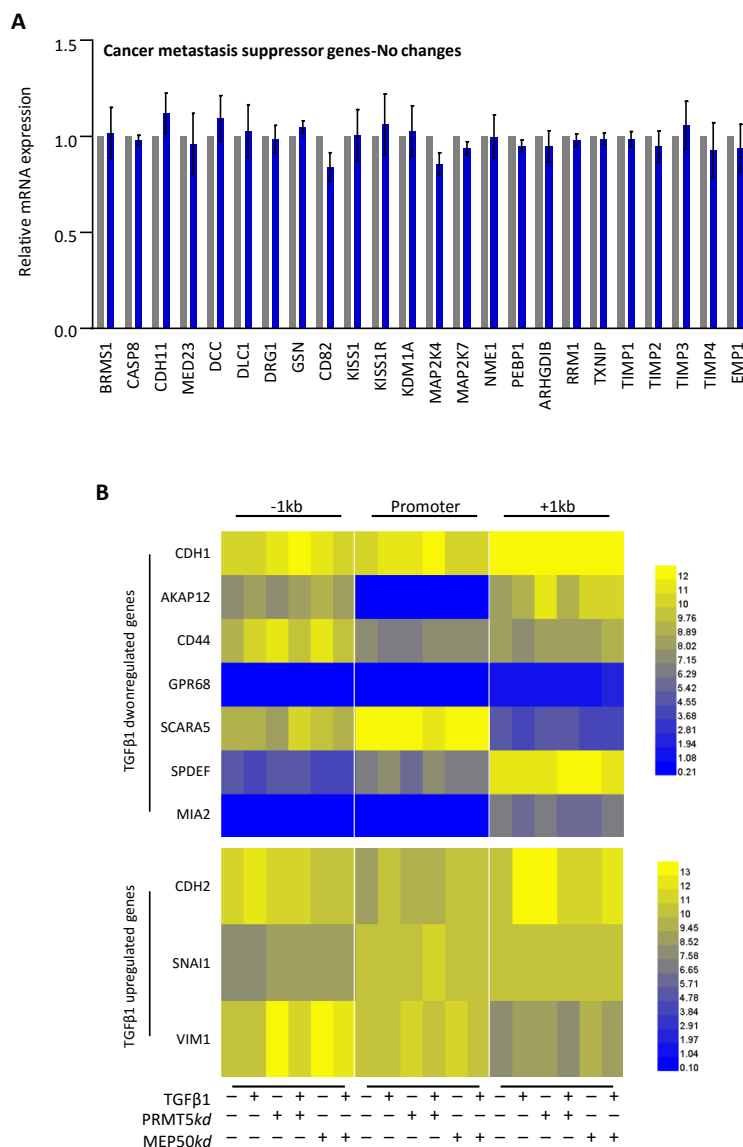

**Figure S5, Related to Figure 6.** Controls for qRT-PCR and ChIP experiments

**A.** Relative mRNA levels of indicated cancer suppressor genes in A549 cells treated with 10 nM of TGF $\beta$ 1 for 2 days were determined by qRT-PCR.  $\beta$ -Actin was used as an internal control. Values are means  $\pm$  S.E.M. of three independent experiments. To normal cells, there has no significant gene expression changes for the ones treated with 10 nM of TGF $\beta$ 1 for 2 days for the genes listed.  $p$  value are measured with one-way ANOVA test.

**B.** Heatmap generated by ChIP-qPCR values for histone H3 values at -1kb, the promoter, or +1kb of the indicated genes demonstrate the H3 was pulled down evenly as the ChIP control for the various histone PTMs in Figure 6. ChIP-qPCR of TGF $\beta$ 1-downregulated genes are arrayed on the top and TGF $\beta$ 1-upregulated genes are on the bottom. The heatmap is arrayed from blue (no enrichment) to yellow (maximal enrichment). Between different groups there is no significant H3 enrichment changes.  $p$  value are measured with one-way ANOVA test.

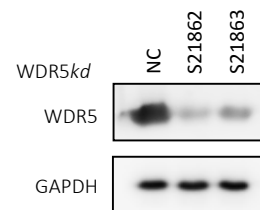

**Figure S6, Related to Figure 7.** Confirmation of depletion of WDR5 in A549 cell line.

Immunoblots for WDR5 and GAPDH as control, from A549 cells infected with siRNA targeted against negative control (NC) or against 2 independent WDR5 siRNA (ID s21862 and s21863) for 3 days.



**Table S1.** Antibodies used in this study.

| Factor or PTM                                 | Vendor            | Cat Number | Dilution For blotting | Vol. for ChIP (μl) |
|-----------------------------------------------|-------------------|------------|-----------------------|--------------------|
| PRMT1                                         | Millipore         | 07-404     | 1:5,000               |                    |
| PRMT3                                         | Gene Tex          | GTX116478  | 1:5,000               |                    |
| CARM1                                         | Cell Signaling    | 4438       | 1:5,000               |                    |
| PRMT5                                         | Millipore         | 07-405     | 1:5,000               |                    |
| MEP50                                         | LPBio             | AR-0145-S  | 1:5,000               |                    |
| PRMT6                                         | Cell Signaling    | 14641      | 1:5,000               |                    |
| PRMT7                                         | Pierce            | PA5-30748  | 1:10,000              |                    |
| PRMT9                                         | Homemade          | N/A        | 1:5,000               |                    |
| E-cadherin                                    | Cell signaling    | 3195       | 1:3,000               |                    |
| Vimentin                                      | Cell signaling    | 5741       | 1:3,000               |                    |
| Snail                                         | Cell signaling    | 3879       | 1:2,000               |                    |
| SYM10                                         | Millipore         | 07-412     | 1:5,000               |                    |
| SNRPD3                                        | Abcam             | ab157118   | 1:10,000              |                    |
| WDR5                                          | Millipore         | 07-706     | 1:5,000               |                    |
| GAPDH                                         | Abcam             | ab9484     | 1:10,000              |                    |
| H3R2me1                                       | Abcam             | ab15584    | 1:5,000               | 8                  |
| H3R2me2s                                      | Abcam             | Ab194684   | 1:5,000               | 6                  |
| H3R8me2s                                      | Novus Biologicals | NB21-1063  | 1:5,000               | 10                 |
| H4R3me1                                       | Novus Biologicals | NB21-2011  | 1:10,000              | 10                 |
| H4R3me2a                                      | Active Motif      | 39705      | 1:10,000              | 8                  |
| H4R3me2s                                      | Abcam             | ab5823     | 1:10,000              | 3                  |
| H3K4me3                                       | abcam             | Ab8580     | 1:10,000              | 5                  |
| H3                                            | Abcam             | ab1791     | 1:100,000             | 4                  |
| HRP-conjugated anti-rabbit secondary antibody | GE                | NA834V     | 1:30,000              |                    |
| HRP-conjugated anti-mouse secondary antibody  | GE                | NA931V     | 1:30,000              |                    |

**Table S2.** ChIP primers used in this study.

The ChIP primers with red bold are the ones used for genes indicated in Figure 6.

| Primer set name | Location in the genome   | Forward sequence        | Reverse sequence        |
|-----------------|--------------------------|-------------------------|-------------------------|
| AKAP12 -1kb     | chr6:151238642+151238737 | TCAAATGGGGGAAATGTGT     | CACGAAGGCCAATTTCTCTG    |
| AKAP12 P        | chr6:151239706+151239799 | TCCGGTAACAGCCTCATTTTC   | ATCCTCCGGAACAAGTGATG    |
| AKAP12 +1kb     | chr6:151240812+151240886 | AGAGAACTTCCCAGCCCATC    | ACCCTGAAAAGCCTCCAAAG    |
| CD44-1kb        | chr11:35138161+35138345  | ATGGTGGATGGTTGTGGTTT    | CATCCTCCTGTCCATCCACT    |
| CD44 P          | chr11:35138742+35138891  | AACCCAGAGATCTTGCTCCA    | GAGACGCACTGGCTTTCTTC    |
| CD44 +1kb       | chr11:35139817+35140003  | TGGTCACAGAAGGGATCACA    | TCATGGAGACCCAAGACCTC    |
| MED23-1kb       | chr6:131585753+131585847 | TTTTTCCCCTCTGCTGTATTCT  | AATTTCCCTGGATAGGCTTTT   |
| MED23 P         | chr6:131586621+131586745 | TAGGCCAATGTCAGTCACCA    | TGATTGTTTCCCGACTCCAT    |
| MED23 +1kb      | chr6:131587945+131588058 | GGAGTGTCTGGGGTAGATG     | GGGTGTGTGTGAGGGAGAAC    |
| GPR68-1kb       | chr14:91231464+91231541  | CAGATGAATTCCAGGGATGG    | TCTTGGCTCGTTGCTTTTCT    |
| GPR68 P         | chr14:91232216+91232332  | CTGGGCTCTGTCTCAAAG      | AGAGCCTTCTCCTCCAC       |
| GPR68 +1kb      | chr14:91233661+91233767  | CACAACTCTGCAGGAAGCA     | GAATAAGCCGTGCCTCTGC     |
| SCARA5-1kb      | chr8:27869187+27869300   | GCTCTTCTCCATGGAACCTG    | GGAAATCCACAAAGGAAGCA    |
| SCARA5 P        | chr8:27869627+27869703   | TCTTGTAAGATGGGCCTTGG    | TGGCTCAAGCCTTATTTGGT    |
| SCARA5 +1kb     | chr8:27870841+27870986   | AGAGGCTTGAAGATGCAAA     | GGAGGAGAGCTGATGTGGAG    |
| SPDEF-1kb       | chr6:34536714+34536828   | CAAGGGAGTGAGACACAGCA    | TGGCAGTGAGCAAATAGCAC    |
| SPDEF P         | chr6:34537854+34537970   | AACTCAGGGGTGCAGATGTC    | AGGGCAGTGACTCGACAAAG    |
| SPDEF +1kb      | chr6:34538618+34538715   | GGTGTAGTTGCGGTGAGGTT    | TACCGGGAGGTTTGTGACTC    |
| MIA2-1kb        | chr14:39233121+39233300  | CCAACGGAAATCACACTGTA    | TCTGCCATTGAAAGAGGTCA    |
| MIA2 P          | chr14:39234123+39234200  | ATTTGGCGTTCACAGAATCC    | AGGTCTGCCAGCAGTTTTGT    |
| MIA2 +1kb       | chr14:39234900+39235017  | TGCAAAATAAATTACATCCCAAT | AAGCAATTTTTGATTCTGCTGAG |
| CDH1 -1kb       | chr16:68735940+68736048  | TGCTGGCCCTATTGTTACT     | CCCTATGCTGTTGTGGGACT    |
| CDH1 P          | chr16:68737215+68737321  | GTGAACCCTCAGCCAATCAG    | TCACAGGTGCTTTGCAGTTC    |
| CDH1 +1kb       | chr16:68738469+68738561  | AGAAATTGCACTCCACACC     | GATCCCCAAATCTGCGTAAA    |
| CDH2 -1kb       | chr18:27950018+27950116  | CAGCATGGAGGCACAGTCTA    | GAGCTTGCCTCTGGGAATTT    |
| CDH2 P          | chr18:27951910+27952010  | GGCACATAAAATCCCAGTGC    | TGGGCTCAGAGGGAATATCA    |
| CDH2 +1kb       | chr18:27951682+27951787  | TGGTCTCATCCCCAAGATA     | TGCTTCAACACGCTTTTGT     |
| VIM -1kb        | chr10:17226963+17227105  | ATGCCTTGTCTCCTTTTCC     | GTGTGCCTGGAACCTTAGA     |
| VIM P           | chr10:17228395+17228494  | GGCCAGCTGTAAGTTGGTA     | CCTAGCGGTTTAGGGGAAAC    |
| VIM +1kb        | chr10:17229220+17229290  | GAGGGACCCTCTTTCTAA      | GAGAGTGGCAGAGGACTGGA    |
| SNAI1 -1kb      | chr20:49981560+49981683  | CGGCACCAAGTGACTAAACA    | CACAGGTCTCACCGTTCTTG    |
| SNAI1 P         | chr20:49983118+49983246  | GCGAGCTGCAGGACTCTAAT    | GTGACTCGATCCTGGCTCA     |
| SNAI1 +1kb      | chr20:49983626+49983698  | GGGTCTACGTGTGAGAGA      | TCCACAGGACAGACCAGGTT    |

**Table S3.** RT-qPCR primers used in this study.

| Gene name | Forward sequence      | Reverse sequence       |
|-----------|-----------------------|------------------------|
| ACTB      | AGCTACGAGCTGCCTGAC    | AAGGTAGTTTCGTGGATGC    |
| PRMT5     | TTGCCGGCTACTTTGAGACT  | ACAGATGGTTTGGCCTTCAC   |
| MEP50     | AGCACTGCCTCTCTCACC    | ACACGGCCAATTCCTCATAG   |
| BRMS1     | GAAGGCACCTCTGGTTTCTG  | CTGCCCTAGCCTTTTTGATG   |
| CASP8     | TCCCCAACTTGCTTTATGC   | GACCCCAGAGCATTGTTAGC   |
| AKAP12    | TGGCAGGAAGACATTCTGTG  | GCGGGTGAATTTAAACAAA    |
| CDH1      | CAAGTGCCTGCTTTTGTGA   | GTTTTCTGTGCACACCTGGA   |
| CDH2      | TGCTTCAACACGCTTTTGT   | TGGTCTCATCCCCAAGATA    |
| CDH11     | CACGGCTCCTCCTTATGACT  | CGAGGTCCCCAGTTCTGTAG   |
| CD44      | AAGGAACCTGCAGAATGTGG  | TCCAACGGTTGTTTCTTTCC   |
| MED23     | AGCCATGAACAGTGGGTCTC  | AATTTGGAACCCTTGCTGTG   |
| DCC       | GGGACCACTTTGGAAATGAA  | AGAAGTGGCGATGATGGAAC   |
| DLC1      | ATCATTCCAAGGCCAAACTG  | GAGAATCTCCGTGCTTCTG    |
| DRG1      | GCTGGATGCTGAACTGTGA   | TGTTTCTTCCACCACATCA    |
| GAS1      | AGATTGTGGCCAGTGAGGAT  | GGCGCAGATACAAACAGTGA   |
| GSN       | ACGGCTGAAGGACAAGAAGA  | TGAGCTCACCAGGAACCTCT   |
| CD82      | GATGGTCTGTCCATCTGCT   | TCAGTACTTGGGGACCTTGC   |
| KISS1     | GACCTGCCTCTTCTCACCAA  | TGGGTCTAGAATTCCCCACA   |
| KISS1R    | TTGGTCTCTTGTGACGTTCCG | TGATCCAGAAAAGTCTGTGTTG |
| KLF17     | GGGAGAGGAAGGGACATAGC  | TCAGGAACCTGGAAGTCACC   |
| KDM1A     | TCTTCTTTGCGGGAGAACAT  | CCCAAAACTGGTCTGCAAT    |
| MAPK14    | TGTATTTGGCCAAGGTGTT   | CACCCTGTCCCTCTGGAGTA   |
| MAP2K4    | CCCCACGGTATCCTAAACT   | CAGATGGGAAGTTGACAGCA   |
| MAP2K7    | GGGCTGCCTGGTTTTATTTT  | AGGGCTCCCCACTTAACACT   |
| NME1      | AGAAAGGATTCCGCCTTGTT  | GGCCCTGAGTGCATGTATTT   |
| PEBP1     | TGTTGGGACATGGCAATCTA  | CATTCAGCAACTCCAGACCA   |
| ARHGDI8   | CTCGGCCTGAGGAGTATGAG  | TGGTCTTGCTTGTATCGTC    |
| RRM1      | CATCCACATTGCTGAGCCTA  | GATTAGCCGCTGGTCTTGTC   |
| TXNIP     | CTTGCCCACTGTGACTTCAA  | TCCTAACACAGGGCAGGAAG   |
| GPR68     | CTGGGTCACTGACATTGGTG  | TGGGAAGCCAGTGTTTAAGG   |
| TIMP1     | TGACATCCGTTTCGTCTACA  | TGCAGTTTCCAGCAATGAG    |
| TIMP2     | CTCTCCATTTGGCATCGTTT  | TTTGAGTTGCTTGCAGGATG   |
| TIMP3     | GGAGAGCTGCAGAGTGCCT   | AGCTAGGGAAAGGGAACCAA   |
| TIMP4     | GCCAGGACTATTCCCTTTCC  | ATGACATTGCCATTTCTCC    |
| MMP2      | AGCGTGAAGTTTGAAGCAT   | CCTCCGGTCTTCTCTAGT     |
| MMP9      | AAGCTGGACTCGGTCTTTGA  | CCTGTGTACACCCACACCTG   |
| SCARA5    | GGAGGAGAGCTGATGTGGAG  | AGAGGCTTGAAGATGCAAA    |
| SPDEF     | GACCAGTGAGGAGAGCTGGA  | CATAGCTGTGGGGCTTGAGT   |
| MIA2      | CAGAGCACATCCCAAACCT   | GCCCTGTATCCTCATCTCCA   |
| EMP1      | GGCTCCTAGGCTCAGTGGTA  | GCCTGTTGTTTGGTTTTGGT   |
| ARHGAP29  | TAAACCACATGCTCCCATCA  | CTTTGTCTGGGTCTGGCATT   |
| SNAI1     | GCTCCACAAGCACCAAGAGT  | ATTCCATGGCAGTGAGAAGG   |
